# Supplementary material
Source: Research Square preprint supplement (doi:10.21203/rs.3.rs-9672846/v1)
Supplement: Supplementary file 1 [file a4c883706aa32410df4a0363.docx]

**Supplementary Material**

**Appendix 1. Focus Group Guide**

**Introduction script**
“Thank you for taking part today. We want to hear your views about climate change, social media, and short videos. There are no right or wrong answers. You can choose not to answer any question, and you may stop at any time. Please respect each other’s views and let everyone have a chance to speak.”

**Opening questions**

- Can you tell us what comes to mind when you hear the words “climate change”?
- Where do you usually hear or see information about climate change?
- What kind of climate-related videos or posts have you seen online?

**Main discussion questions**

- Which apps or platforms do you use most often for this kind of content?
- What do you think when you see short videos about climate change?
- Do these videos make climate change seem serious, confusing, interesting, or something else?
- How do you know whether a climate-related post is true or not?
- Have you ever felt worried, upset, or confused after seeing climate-related content online?
- Do you think climate change affects children or young people in any way?
- Does any of the online content talk about health, like heat, breathing, floods, illness, or stress?
- Do you talk to your parents, friends, or teachers about what you see online?
- What kind of information would help young people understand climate change better?
- What would you want schools to do about climate change education?
- What do you think adults should do to help young people with climate worries?

**Closing questions**

- Is there anything else you want to say about climate change and social media?
- What is one message you would give to adults about how they talk to children about climate change?

**Moderator prompts**

Can you explain that a little more? How did that make you feel? Can you give an example? Did anyone else have a similar or different experience? What do others think about that?
